# Supplementary material
Source: MDPI journal article supplement (https://www.mdpi.com/2071-1050/14/3/1915)
Supplement: s1 [file s1]

Dear Sirs,

The following survey is anonymous. It is for scientific purposes only. Please mark the answers corresponding to your preferences. Please, select one answer for each question

**1. Gender**

|        |  |
|--------|--|
| Female |  |
| Male   |  |

**2. Age**

|                |  |
|----------------|--|
| 18-26          |  |
| 27-35          |  |
| 36-44          |  |
| 45-53          |  |
| > 54-years-old |  |

**3. Educational level**

|                   |  |
|-------------------|--|
| Primary education |  |
| High school       |  |
| University        |  |

**4. Place of residence**

|                                     |  |
|-------------------------------------|--|
| Village                             |  |
| City up to 25 thousand inhabitants  |  |
| City of 25-100 thousand inhabitants |  |
| City of over 100,000 inhabitants    |  |

**5. How often do you visit the forests?**

|                       |  |
|-----------------------|--|
| Do not visit          |  |
| Several times a year  |  |
| Several times a month |  |
| One a week            |  |
| Daily                 |  |

**6. How many educational boards did you pay attention to?**

|     |     |     |                |
|-----|-----|-----|----------------|
| 1-2 | 3-4 | 5-6 | At more than 7 |
|-----|-----|-----|----------------|

**7. What determines the attractiveness of an educational board?**

|                                    |  |
|------------------------------------|--|
| Graphic form                       |  |
| Content                            |  |
| Location of the board in the field |  |

**8. To what extent do educational boards support in-formal forest education activities?**

|            |       |        |       |            |
|------------|-------|--------|-------|------------|
| Very small | Small | Medium | Large | Very large |
|------------|-------|--------|-------|------------|

**9. Are educational boards needed on forest trails?**

|            |  |
|------------|--|
| Yes        |  |
| No         |  |
| Sometimes  |  |
| No opinion |  |

**10. The educational board should include (choose one answer)**

|                                       |  |
|---------------------------------------|--|
| Text and graphics in proportion 50/50 |  |
| More graphics than text               |  |
| More text than graphics               |  |
